# Supplementary material for: Eco-Efficiency of the Fisheries Value Chains in the Gambia and Mali
Source: MDPI journal article supplement (doi:10.3390/foods10071620), 2021-07-13
Supplement: s1 [file s1]

## **Supplementary material for:**

### **Eco-efficiency of the fisheries value chains in Gambia and Mali**

Angel Avadí<sup>1,2,\*</sup>, Ivonne Acosta-Alba<sup>3,4</sup>

<sup>1</sup> CIRAD, UPR Recyclage et risque, F-34398 Montpellier, France

<sup>2</sup> Recyclage et risque, Univ Montpellier, CIRAD, Montpellier, France

<sup>3</sup> CIRAD, UMR Innovation, F-34398, Montpellier, France

<sup>4</sup> Evalivo, Sustainability Assessment of Food Systems, 02100 Saint Quentin, France

\* Corresponding author: [angel.avadi@cirad.fr](mailto:angel.avadi@cirad.fr), Tel.: +33 4 67 61 59 67

#### **1 Supplementary data on the Gambian fisheries value chain**

More details and data are available in the VCA4D project report “Fisheries and aquaculture Value Chain Analysis in The Gambia” (Avadí et al., 2020).

1.1 Detailed value chains mapping

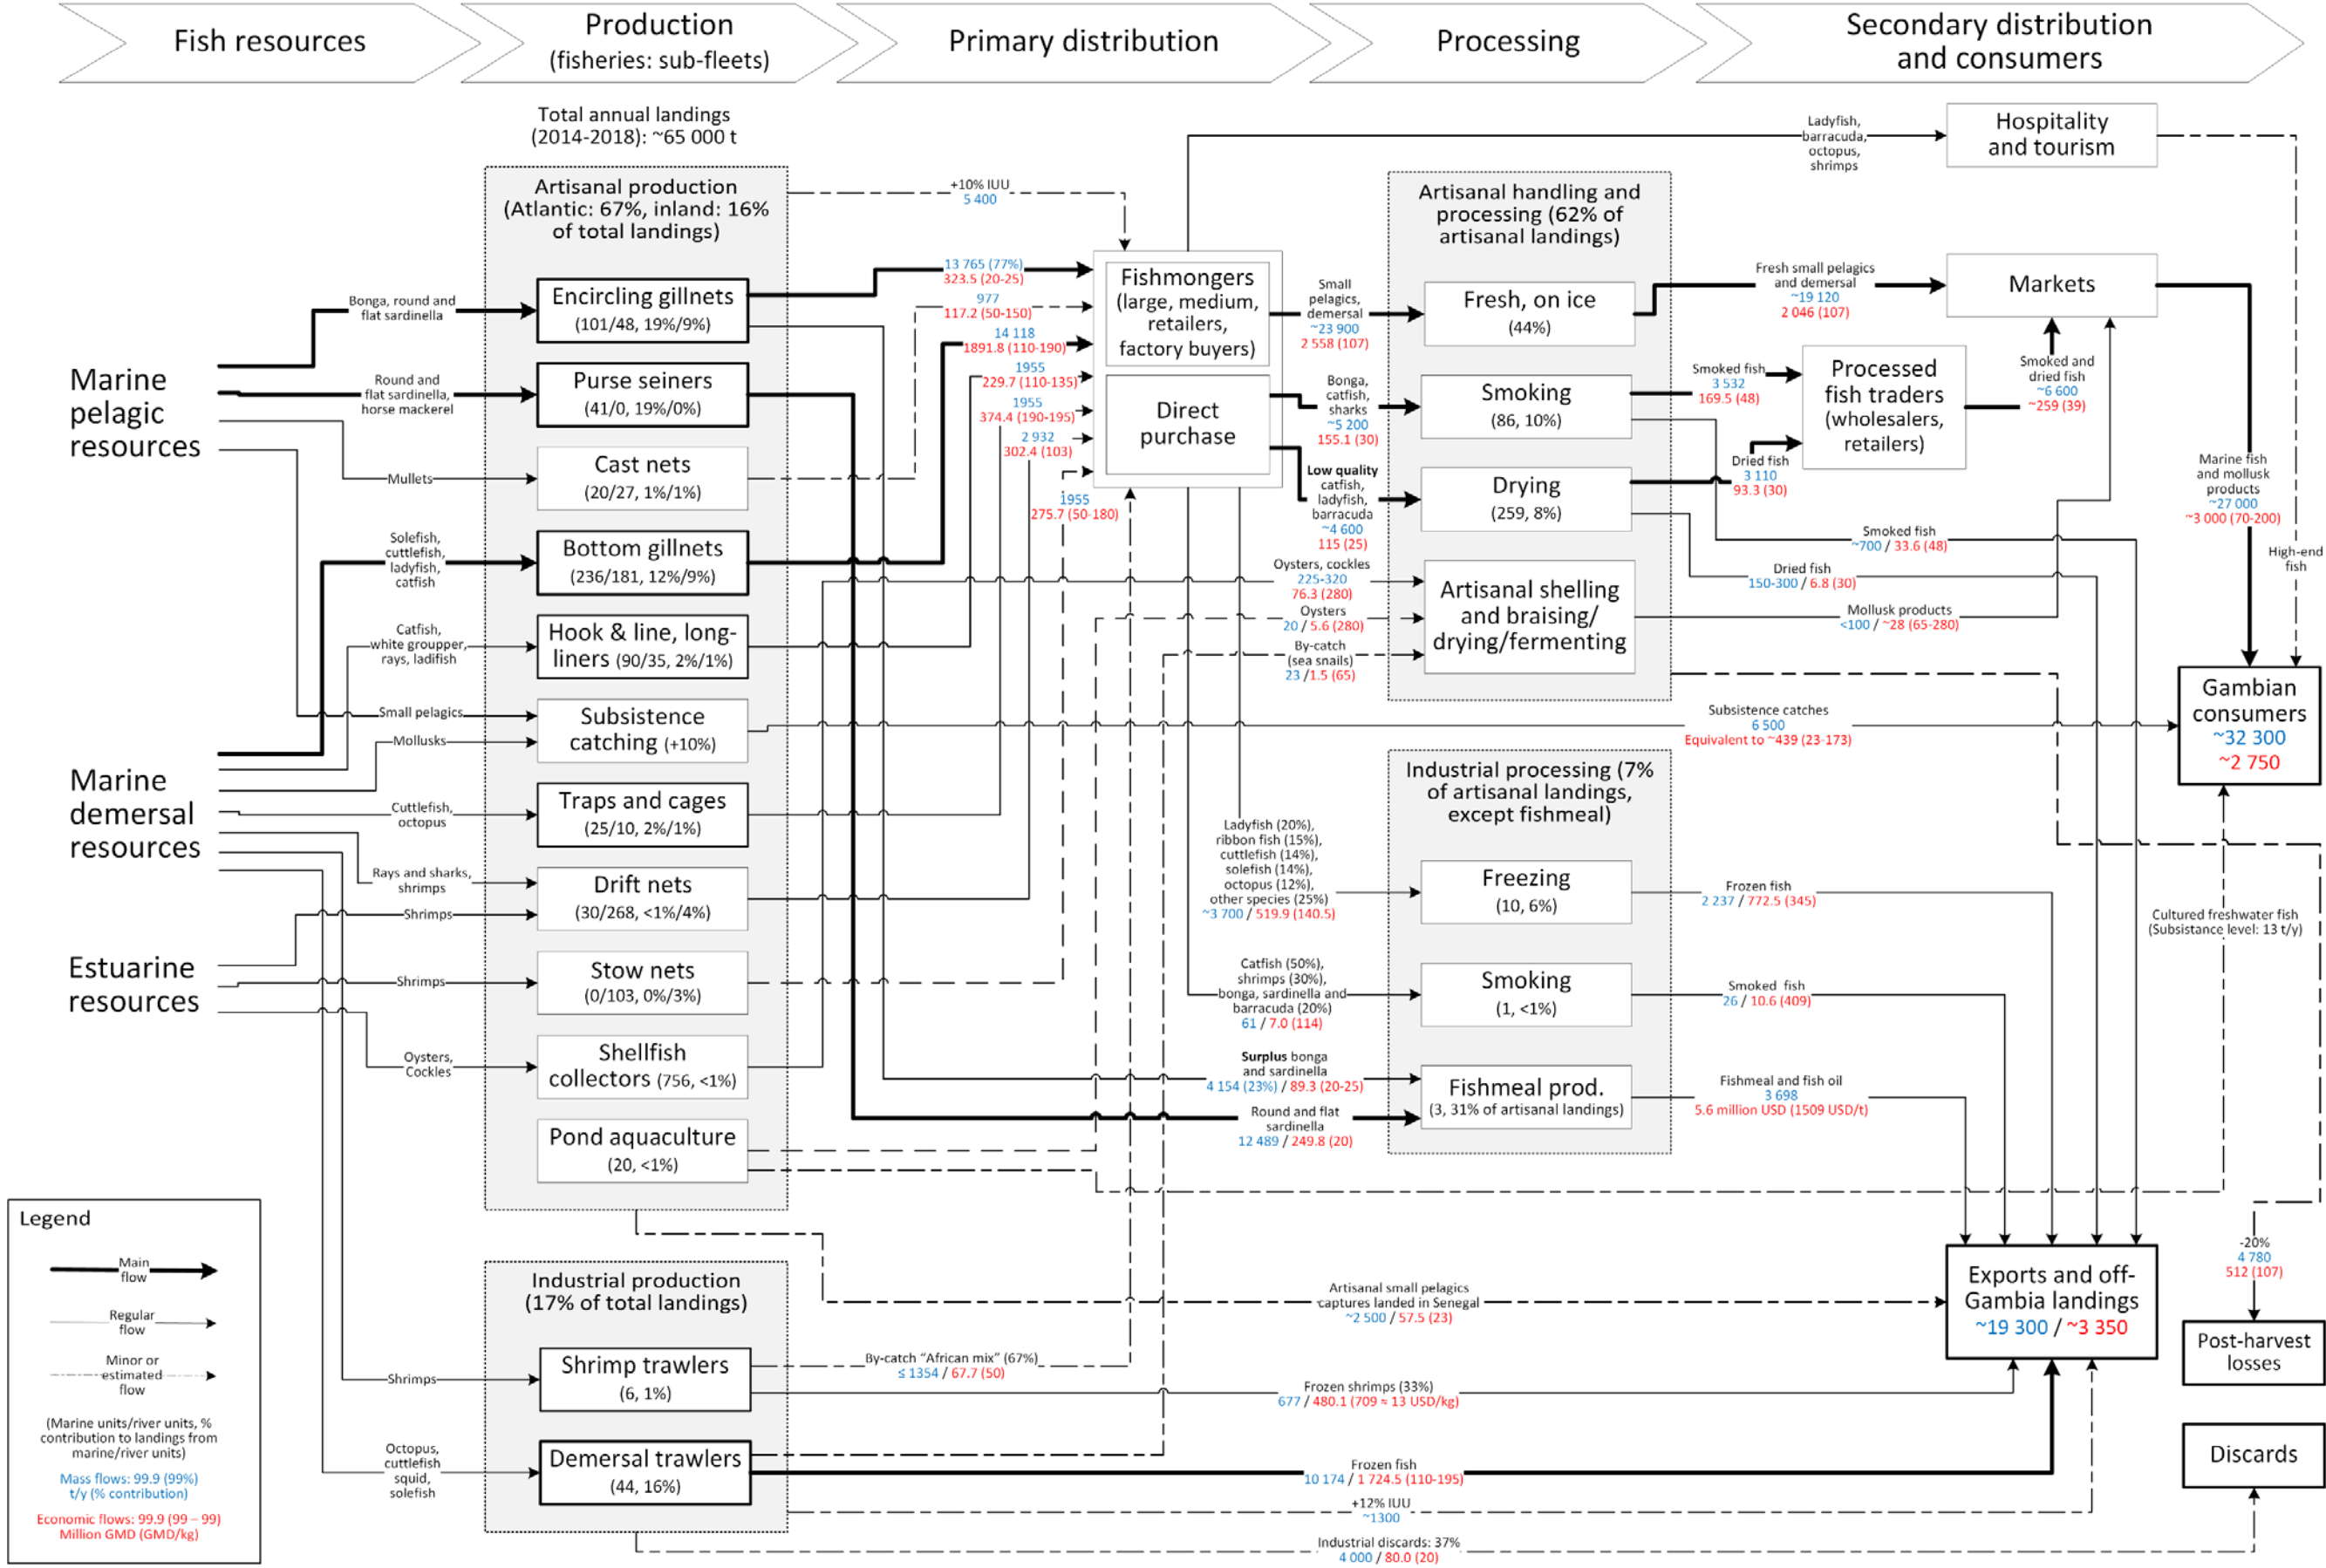

Figure S1. Mapping of the main actors and major material and economic flows in the value chain (detailed)

## 1.2 LCIs

**Table S1. Abridged life cycle inventories of sub-fleets (units of production for fisheries) in The Gambia (average 2014-2018)**

|                                      |       | Artisanal units of production                |                                       |                                           |                                        |                     |                                                    |           |                        | Industrial units of production   |                                   |                                     |
|--------------------------------------|-------|----------------------------------------------|---------------------------------------|-------------------------------------------|----------------------------------------|---------------------|----------------------------------------------------|-----------|------------------------|----------------------------------|-----------------------------------|-------------------------------------|
| Item                                 | Units | Set/bottom gillnet                           | Encircling gillnet                    | Purse seine                               | Hook and line/ long line               | Traps and cages     | Drift nets                                         | Cast nets | Stow nets              | Shrimp trawlers (SN), 90-230 GRT | Demersal trawlers (CN), 20-90 GRT | Demersal trawlers (CN), 150-400 GRT |
| Fishery                              |       |                                              |                                       |                                           |                                        |                     |                                                    |           |                        |                                  |                                   |                                     |
| Total units                          | Count | 417                                          | 149                                   | 41                                        | 125                                    | 35                  | 298                                                | 47        | 103                    | 6                                | 20                                | 29                                  |
| Atlantic units                       | Count | 236                                          | 101                                   | 41                                        | 90                                     | 25                  | 30                                                 | 20        | 0                      | 6                                | 20                                | 29                                  |
| River units                          | Count | 181                                          | 48                                    | 0                                         | 35                                     | 10                  | 268                                                | 27        | 103                    | 0                                | 0                                 | 0                                   |
| Target species                       |       | Sole, cuttlefish, lobster, ladyfish, catfish | Bonga shad, round and flat sardinella | Round and flat sardinella, horse mackerel | Catfish, white grouper, rays, ladyfish | Cuttlefish, octopus | Rays and sharks (Atlantic), pink shrimps (estuary) | Mulletts  | Pink shrimps (estuary) | Pink shrimps                     | Octopus, cuttlefish, squid, sole  | Octopus, cuttlefish, squid, sole    |
| Total landings per sub-fleet         | t/y   | 14 118                                       | 17 919                                | 12 489                                    | 1 955                                  | 1 955               | 2 932                                              | 977       | 1 955                  | 677                              | 1 453                             | 8 721                               |
| Fleet motorisation                   | %     | 92                                           | 93                                    | 93                                        | 28                                     | 92                  | 93                                                 | N/A       | 9                      | 100                              | 100                               | 100                                 |
| Vessel characteristics               |       |                                              |                                       |                                           |                                        |                     |                                                    |           |                        |                                  |                                   |                                     |
| Dominant build type                  |       | Wooden, planked                              | Wooden, planked                       | Wooden, planked                           | Wooden, planked                        | Wooden, planked     | Wooden, planked                                    | N/A       | Wooden, planked        | Steel                            | Steel                             | Steel                               |
| Length                               | m     | 10                                           | 18                                    | 22                                        | 7                                      | 8                   | 18                                                 | N/A       | 5                      | 41                               | 24                                | 41                                  |
| Width                                | m     | 2                                            | 5                                     | 8                                         | 2                                      | 2                   | 5                                                  | N/A       | 1                      | 7                                | N/A                               | N/A                                 |
| LSW                                  | kg    | 3 139                                        | 5 323                                 | 6 876                                     | 2 667                                  | 2 718               | 5 155                                              | N/A       | 2 316                  | 22 972                           | 7 617                             | 22 665                              |
| Engine                               | HP    | 22                                           | 32                                    | 53                                        | 15                                     | 20                  | 40                                                 | N/A       | N/A                    | 721                              | 309                               | 1259                                |
| FUI                                  | L/t   | 372                                          | 163                                   | 104                                       | 420                                    | 47                  | 441 - 474                                          | N/A       | N/A                    | 1553 - 2 213                     | 2 117                             | 2 117                               |
| Landings per vessel (incl. by-catch) | t/y   | 33.9                                         | 120.3                                 | 304.6                                     | 15.6                                   | 55.9                | 9.8                                                | 20.8      | 19.0                   | 282.0                            | 72.7                              | 300.7                               |
| By-catch                             | %     | 16.6                                         | 3.4                                   | -                                         | 36.0                                   | -                   | 45.7                                               | -         | 70.0                   | 66.7                             | 10                                | 10                                  |
| Fuel                                 | L/y   | 12 600                                       | 19 600                                | 31 800                                    | 6 561                                  | 2 600               | 4 667                                              | N/A       | N/A                    | 438 025                          | 153 839                           | 636 575                             |

|                               |       | Artisanal units of production |                    |             |                          |                 |            |           |           | Industrial units of production                                         |                                   |                                     |
|-------------------------------|-------|-------------------------------|--------------------|-------------|--------------------------|-----------------|------------|-----------|-----------|------------------------------------------------------------------------|-----------------------------------|-------------------------------------|
| Item                          | Units | Set/bottom gillnet            | Encircling gillnet | Purse seine | Hook and line/ long line | Traps and cages | Drift nets | Cast nets | Stow nets | Shrimp trawlers (SN), 90-230 GRT                                       | Demersal trawlers (CN), 20-90 GRT | Demersal trawlers (CN), 150-400 GRT |
| Lubricating oil               | L/y   | -                             | -                  | -           | -                        | -               | -          | -         | -         | 9.2                                                                    | 9.2                               | 9.2                                 |
| Ice                           | t/y   | 1.1                           | -                  | -           | 1.1                      | 1.1             | -          | -         | -         | -                                                                      | -                                 | -                                   |
| Bait                          | t/y   | -                             | -                  | -           | 20.3                     | -               | -          | -         | -         | -                                                                      | -                                 | -                                   |
| Refrigerant (R22)             | kg/y  | -                             | -                  | -           | -                        | -               | -          | -         | -         | 0.69                                                                   | 0.69                              | 0.69                                |
| Allocation key for main catch | %     | 88                            | 93                 | 100         | 67                       | 100             | 72         | 100       | 61        | 77                                                                     | 93                                | 93                                  |
| Vessel construction           |       |                               |                    |             |                          |                 |            |           |           |                                                                        |                                   |                                     |
| Wood                          | m3    | 4.0                           | 6.7                | 8.7         | 3.4                      | 3.4             | 6.5        | N/A       | 2.9       | 0                                                                      | 0                                 | 0                                   |
| Engine                        | kg    | 57                            | 97                 | 112         | 50                       | 57              | 97         | N/A       | N/A       | 1 283                                                                  | 565                               | 2 220                               |
| Gear                          | kg    | 100                           | 200                | 500         | 23                       | 6               | 400        | 5         | 25        | 4 260                                                                  | 1 098                             | 4 542                               |
| Galvanised nails              | kg    | 10.13                         | 17.17              | 22.18       | 8.60                     | 8.77            | 16.63      | N/A       | 7.47      | Proxy processes from ecoinvent 3.5 used in the absence of primary data |                                   |                                     |
| Iron rods                     | kg    | 284.88                        | 483.02             | 623.94      | 241.98                   | 246.67          | 467.81     | N/A       | 210.20    |                                                                        |                                   |                                     |
| Antifouling paint             | kg    | 11.14                         | 18.89              | 24.40       | 9.46                     | 9.65            | 18.30      | N/A       | 8.22      |                                                                        |                                   |                                     |
| Tarpaulin                     | kg    | 15.24                         | 25.84              | 33.38       | 12.95                    | 13.20           | 25.03      | N/A       | 11.25     |                                                                        |                                   |                                     |
| Tar                           | kg    | 32.70                         | 55.44              | 71.62       | 27.78                    | 28.31           | 53.70      | N/A       | 24.13     |                                                                        |                                   |                                     |
| PET foam                      | kg    | 197.51                        | 334.88             | 432.58      | 167.77                   | 171.02          | 324.34     | N/A       | 145.73    |                                                                        |                                   |                                     |

**Sources:** DoF data, DoF (2016), field visits to landing sites, engine providers, UNEP (2014), field visits to artisanal vessels construction sites. Proxy data for industrial sub-fleets was retrieved from Senegalese shrimp trawlers data (M. Deme; F. Ziegler, pers. comm.) and Mauritanian cephalopods/demersal trawlers (Vázquez-Rowe et al., 2012). Primary data for artisanal driftnets targeting shrimps was complemented with Senegalese data (F. Ziegler, pers. comm.). **Notes:** Landings per fleet and total landings differ slightly from the official figures because by-catch estimations from UNEP (2014) have been added to compute the FUI. By-catch by demersal trawlers was unknown, but assumed at 10% and consisting of small pelagics (which are or should be landed in The Gambia). The demersal trawler fleet was divided in two segments to highlight the size diversity, but not enough data was available to estimate FUI for each segment, thus the whole fleet was modelled as a homogenous type of unit of production. The weighted average of (artisanal) pelagic FUI is 150 L/t, and of demersal is 401 L/t. The weighted average of industrial demersal FUI is 2 055 L/T. The allocation key was computed based on the relative prices of target catch and by-catch (Acosta-Alba and Avadí, 2021). **Abbreviations:** FUI – fuel use intensity, LSW – lightship weight, GRT – gross registered tonnage

**Table S2. Abridged life cycle inventories of processing facilities (units of production for processing) in The Gambia (average 2014-2018)**

| Item                         | Unit  | Artisanal units of production |                        | Industrial units of production |               |             |
|------------------------------|-------|-------------------------------|------------------------|--------------------------------|---------------|-------------|
|                              |       | Artisanal fish drying         | Artisanal fish smoking | Freezing plants                | Smoking plant | FMFO plants |
| Samples / sites              |       | 3/3                           | 3/3                    | 2/1                            | 1/1           | 3/3         |
| Cold storage capacity        | t     |                               |                        | 580                            | 12            |             |
| Fish processed               | t/y   | 21.5                          | 134.8                  | 1 658                          | 61            | 16 642      |
| Product yield                | t/y   | 7.2                           | 47.2                   | 1 314                          | 26            | 3 698       |
| Conversion ratio             |       | 3.0                           | 2.9                    | 1.3                            | 2.3           | 4.5         |
| Water                        | m3/y  |                               |                        | 33 522                         | 240           | 29 789 974  |
| Ice                          | t/y   |                               |                        | 1 169                          | 6.0           |             |
| Salt                         | kg/y  | 5 775                         |                        |                                | 200           |             |
| Electricity                  | kWh/y |                               |                        | 1 008 846                      | 51 923        | 254 629     |
| Chemicals (detergents, etc.) | L/y   |                               |                        | 1 989                          |               | 22 634      |
| Refrigerating gas (R-22)     | kg/y  |                               |                        |                                | 27.2          |             |
| Cardboard                    | kg/y  |                               |                        | 6 572                          | 130           |             |
| Plastic                      | kg/y  |                               |                        | 16 115                         | 20            | 8 538       |
| Diesel                       | L/y   |                               |                        | 25 300                         | 600           |             |
| Charcoal                     | kg/y  |                               |                        |                                | 6 000         |             |
| Coconut husks                | kg/y  |                               |                        |                                | 2 000         |             |
| Wood                         | m3/y  |                               | 93                     |                                |               |             |
| Heavy fuel (R500)            | MJ/y  |                               |                        |                                |               | 39 941 865  |
| Antioxidants                 | kg/y  |                               |                        |                                |               | 1 664       |
| Wastewater                   | m3/y  |                               |                        | 33 522                         | 240           | 29 789 974  |
| Waste                        | t/y   | 1.1                           | 6.7                    | 343                            | 4             |             |

Sources: primary data except for fishmeal plants (FMFO), which was adapted from Fréon et al. (2017)

1.3 Impacts

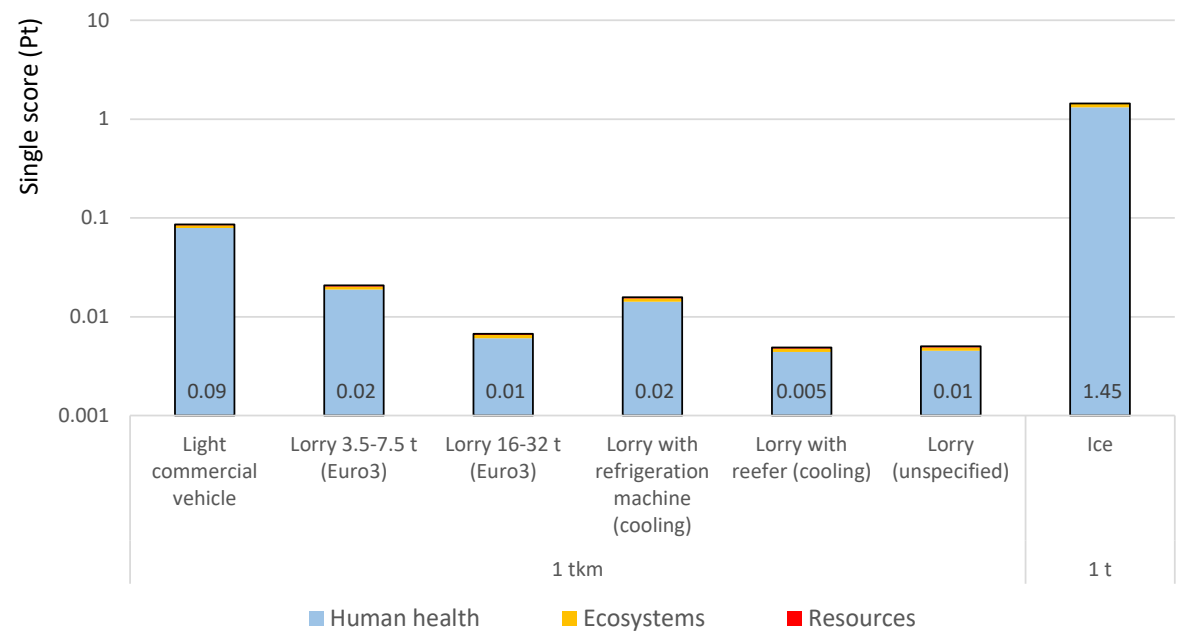

Figure S2. Impacts of transporting 1 tkm of product (log scale), under different vehicle standards, and impacts of producing 1 t of ice in The Gambia

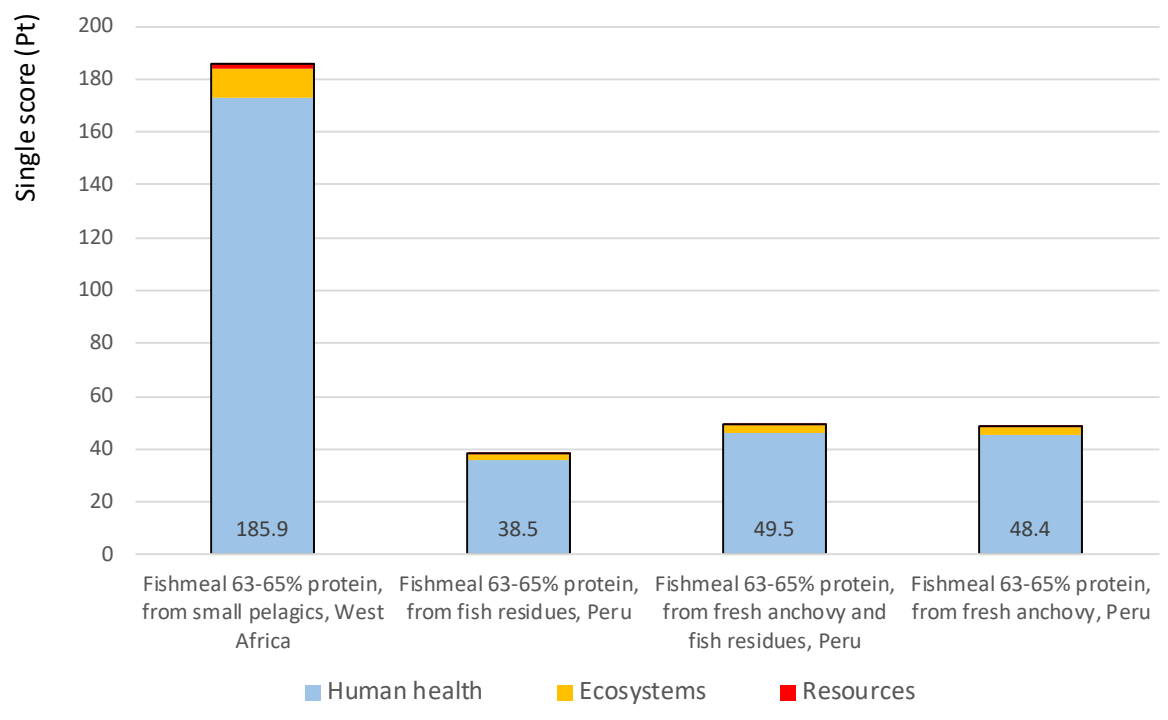

Figure S3. Comparison of West African and global fishmeal production, per t of product and per area of protection

**Table S3. LCIA of Gambian fisheries (ReCiPe 2016 Endpoint (H) V1.03 / World (2010) H/A (per Area of Protection) and Cumulative Energy Demand v1.11) including energy (Gross Energy Content) and protein in whole fish**

| Systems                                                                               | Species                                               | Total   | Human health | Ecosystems | Resources | CED     | GEC   | Protein | Edible yield |
|---------------------------------------------------------------------------------------|-------------------------------------------------------|---------|--------------|------------|-----------|---------|-------|---------|--------------|
|                                                                                       |                                                       | Pt      | Pt           | Pt         | Pt        | MJ      | MJ/kg | %       | %            |
| Small pelagic fish, capture by artisanal encircling gillnets and landing whole, fresh | Bonga shad, Round sardinella, Flat sardinella         | 45.7    | 42.4         | 2.8        | 0.5       | 7 437   | 7.1   | 20.7    | 62.0         |
| Small pelagic fish, capture by artisanal purse seines and landing whole, fresh        | Round sardinella, Flat sardinella, Horse mackerel     | 30.4    | 28.3         | 1.8        | 0.3       | 4 946   | 6.8   | 21.1    | 60.3         |
| Small pelagic fish, capture by artisanal cast nets and landing whole, fresh           | Mulletts                                              | 0.03    | 0.02         | 0.002      | 0.001     | 11.7    | 4.9   | 20.0    | 50.0         |
| Demersal fish, capture by artisanal bottom gillnets and landing whole, fresh          | Sole, Cuttlefish, Lobster, Ladyfish, Catfish (marine) | 114.3   | 106.2        | 6.9        | 1.3       | 18 578  | 5.7   | 20.5    | 60.0         |
| Demersal fish, capture by artisanal lines and landing whole, fresh                    | Catfish, White grouper, Rays, Ladyfish                | 190.0   | 176.4        | 11.5       | 2.1       | 31 190  | 6.1   | 21.2    | 59.8         |
| Cephalopods, capture by artisanal traps and cages and landing whole, fresh            | Cuttlefish, Octopus                                   | 13.7    | 12.7         | 0.9        | 0.2       | 2 407   | 4.6   | 17.7    | 65.5         |
| Demersal fish, capture by artisanal driftnets and landing whole, fresh                | Rays, Sharks                                          | 190.8   | 176.7        | 12.0       | 2.2       | 34 871  | 6.6   | 21.0    | 70.0         |
| Shrimp, capture by artisanal stow nets and landing whole, fresh                       | Pink shrimps                                          | 0.9     | 0.7          | 0.3        | 0.01      | 1 289   | 5.2   | 20.4    | 57.0         |
| Average artisanal-caught pelagic fish                                                 | Bonga shad, Round sardinella, Flat sardinella         | 39.4    | 36.6         | 2.4        | 0.4       | 6 416   | 7.1   | 20.7    | 62.0         |
| Average artisanal-caught demersal fish                                                | Sole, Cuttlefish, Ladyfish, Catfish (marine), Octopus | 121.6   | 112.9        | 7.4        | 1.3       | 20 353  | 5.5   | 19.9    | 61.6         |
| Shrimp, capture by industrial trawler and landed whole, frozen                        | Pink shrimps                                          | 1 047.6 | 973.7        | 62.4       | 11.4      | 165 014 | 5.2   | 20.4    | 57.0         |
| Cephalopods and demersal fish, capture by industrial trawler and landed whole, frozen | Cuttlefish, Octopus, Ladyfish, Sole                   | 632.3   | 587.7        | 37.6       | 6.9       | 99 596  | 5.4   | 19.5    | 64.0         |

**Table S4. LCIA of Gambian fish processing (ReCiPe 2016 Endpoint (H) V1.03 / World (2010) H/A (per Area of Protection) and Cumulative Energy Demand v1.11) including energy (Gross Energy Content) and protein in whole fish**

| Systems                                                       | Species                                                | Total | Human health | Ecosystems | Resources | CED       | GEC  | Protein |
|---------------------------------------------------------------|--------------------------------------------------------|-------|--------------|------------|-----------|-----------|------|---------|
|                                                               |                                                        | Pt    | Pt           | Pt         | Pt        | MJ        | MJ   | %       |
| Dried fish (artisanal)                                        | Catfish (marine),<br>Ladyfish                          | 383.1 | 356.3        | 22.8       | 4.0       | 61 417.9  | 17.5 | 61.7    |
| Smoked fish (artisanal)                                       | Bonga shad, Catfish<br>(marine), Sharks                | 308.4 | 282.9        | 22.2       | 3.3       | 68 783.1  | 10.7 | 33.9    |
| Smoked fish (industrial)                                      | Catfish, Pink shrimps,<br>Bonga shad                   | 274.4 | 252.0        | 19.5       | 2.8       | 72 927.4  | 10.7 | 33.9    |
| Frozen fish (industrial)                                      | Ladyfish, Ribbon fish,<br>Cuttlefish, Sole,<br>Octopus | 204.8 | 190.4        | 12.4       | 2.0       | 39 184.1  | 5.5  | 19.4    |
| Fishmeal, 63-65% protein, from<br>small pelagics, West Africa | Round sardinella, Flat<br>sardinella                   | 185.9 | 172.7        | 11.3       | 1.8       | 32 456.7  | 17.9 | 64.0    |
| Shellfish collecting and braising                             | Oysters, Cockles                                       | 64.0  | 21.0         | 42.5       | 0.4       | 207 560.4 | 4.7  | 18.0    |



## 2 Supplementary data on the Malian fisheries value chain

More details and data are available in the VCA4D project report “Analyse de la chaîne de la pêche continentale en République du Mali” (Andres et al., 2020).

**Table S5. Modelled Malian fishing products volume per year**

| Products                              | Total quantity (t) | Fresh equivalent (t) |
|---------------------------------------|--------------------|----------------------|
| Fresh fish at fishing zone markets    | 55 000             | 55 000               |
| Fresh fish at urban markets           | 23 000             | 23 000               |
| Smoked fish at fishing zone markets   | 6 667              | 20 000               |
| Smoked fish at urban markets          | 9 333              | 28 000               |
| Imported frozen Fish (small pelagics) | 64 000             | 64 000               |
| Imported frozen Fish (fish farming)   | 16 000             | 16 000               |
| Export – smoked fish                  | 1 333              | 4 000                |
| Total                                 |                    | 210 000              |

### 2.1 LCIs

**Table S6. Main characteristics of artisanal fishing units in Mali**

| Variables by type of fishing unit     | Units  | Casual (opportunistic) fishers | Agro- (part-time) fishers | Migrant professional (full-time) fishers | Sedentary professional (diversified) fishers |
|---------------------------------------|--------|--------------------------------|---------------------------|------------------------------------------|----------------------------------------------|
| Fishing Units (FU)                    |        | 178 571                        | 6 387                     | 6 100                                    | 31 371                                       |
| Total annual landings                 | t      | 30 000                         | 5 000                     | 29 000                                   | 66 000                                       |
| Landing per FU/year                   | t      | 0.168                          | 0.787                     | 4.680                                    | 2.100                                        |
| Fishing season period                 | months | 3                              | 5                         | 12                                       | 12                                           |
| Fishermen per FU                      |        | 1                              | 3                         | 4.5                                      | 3.5                                          |
| Canoes per UF                         |        | -                              | 2                         | 3                                        | 2                                            |
| Self-consumption proportion           | %      | 100                            | 16                        | 11                                       | 20                                           |
| Small sized fish in landings          | %      |                                | 25                        | 25                                       | 25                                           |
| Higher priced fish in landings        | %      |                                | 58                        | 25                                       | 38                                           |
| Proportion of smoked fish per landing | %      |                                | 17                        | 50                                       | 37                                           |
| Fuel intensity use                    | l/t    | -                              | 96                        | 233                                      | 69                                           |

**Table S7. Abridged life cycle inventories of canoes (per fishing units) in Mali (average 2017-2019)**

| Variables  | Units | Agro- (part-time) fishers | Migrant professional (full-time) fishers | Sedentary professional (diversified) fishers | Description             | Ecoinvent background process used (Cut-off, U) market for                       |
|------------|-------|---------------------------|------------------------------------------|----------------------------------------------|-------------------------|---------------------------------------------------------------------------------|
| Canoe size | m     | 8                         | 8                                        | 8                                            |                         |                                                                                 |
| Lifetime   | yr    | 7                         | 10                                       | 10                                           |                         |                                                                                 |
| wood       | t     | 1                         | 1                                        | 1                                            | African mahogany (Khaya | Occupation, forest, used et Sawnwood, board, softwood, raw, dried (u=20%) {GLO} |

|                                                     |       |      |      |      |                                                                      |                                                                                                                       |
|-----------------------------------------------------|-------|------|------|------|----------------------------------------------------------------------|-----------------------------------------------------------------------------------------------------------------------|
|                                                     |       |      |      |      | senegalensis)<br>(density 0.78)                                      |                                                                                                                       |
| Imported wood for Canoes                            | km    | 1500 | 1500 | 1500 | 80% from Ghana or Ivory Coast                                        | Transport, freight, lorry 16-32 metric ton, euro3 {RoW}  market for transport, freight, lorry 16-32 metric ton, EURO3 |
| Nails                                               | g     | 500  | 500  | 500  | Steel                                                                | Steel, low-alloyed {GLO}                                                                                              |
| Motorized canoes                                    | %     | 50   | 50   | 10   |                                                                      | Motor scooter, 50 cubic cm engine {RoW}  motor scooter                                                                |
| Engine power                                        | HP    | 16   | 16   | 16   |                                                                      |                                                                                                                       |
| Engine lifetime                                     | yr    | 3    | 3    | 3    |                                                                      |                                                                                                                       |
| Fuel consumption                                    | l/yr  | 76   | 941  | 126  | Manufacturing and combustion                                         | Diesel, burned in fishing vessel {GLO}  market for diesel, burned in vessel                                           |
| Shea butter (manufacture and maintenance of canoes) | kg/yr | 35   | 45   | 45   | Manufacturing Shea is mostly manual, combustion is based on firewood |                                                                                                                       |

**Table S8. Abridged life cycle inventories of fishing gear (per fishing units) in Mali (average 2017-2019)**

| Gears                           | Units    | Casual<br>(opportunistic) fishers | Agro- (part-time)<br>fishers | Migrant<br>(full-time)<br>fishers | Sedentary<br>(diversified)<br>fishers | Description                                                                                                                                                                                                                                         | Ecoinvent background process used<br>(Cut-off, U)               |
|---------------------------------|----------|-----------------------------------|------------------------------|-----------------------------------|---------------------------------------|-----------------------------------------------------------------------------------------------------------------------------------------------------------------------------------------------------------------------------------------------------|-----------------------------------------------------------------|
| Surface gillnets<br>300m linear | quantity |                                   | 3.0                          | 2.6                               | 3.0                                   | Main species caught: <i>Alestes</i> and <i>Brycinus</i>                                                                                                                                                                                             |                                                                 |
| Weight                          | kg/yr    |                                   | 1.8                          | 1.6                               | 1.8                                   | Nylon (polyamide Polystyrene floats), if recycled material is considered in the end of life                                                                                                                                                         | Nylon 6 {GLO}  market for                                       |
| Lifetime                        | yr       |                                   | 1.5                          | 2                                 | 1.5                                   |                                                                                                                                                                                                                                                     |                                                                 |
| Bottom gillnets<br>400m linear  | quantity |                                   |                              |                                   | 5.6                                   | Species caught: <i>Alestes sp</i> , <i>Brycinus sp</i> , <i>Bagrus sp</i> , <i>Heterobranchus</i> , <i>Clarias sp</i> , <i>Hydrocynus sp</i> , <i>Labeo sp</i> , <i>Lates niloticus</i> , <i>Oreochromis</i> , <i>Sarotherodon</i> , <i>Tilapia</i> |                                                                 |
| Weight                          | kg/yr    |                                   |                              |                                   | 3,2                                   | nylon 80% and polyethylene                                                                                                                                                                                                                          | Polyethylene et Nylon 6 {GLO}                                   |
| Floats                          |          |                                   |                              |                                   |                                       | Polystyrene, recycling material not included                                                                                                                                                                                                        |                                                                 |
| Leads - ballast                 | quantity |                                   |                              |                                   | 200                                   | (50% terracotta; 50% lead from inside of car batteries recycling), only 10% remains in the water                                                                                                                                                    |                                                                 |
| Weight                          | kg/yr    |                                   |                              |                                   | 1.0                                   |                                                                                                                                                                                                                                                     |                                                                 |
| Lifetime                        | yr       |                                   |                              |                                   | 1.5                                   |                                                                                                                                                                                                                                                     |                                                                 |
| Cast nets                       | quantity | 1                                 | 5.0                          | 3                                 | 5.0                                   | Main species caught: All species except <i>Clarias</i>                                                                                                                                                                                              |                                                                 |
| Weight                          | kg/yr    | 0.15                              | 0.75                         | 0.45                              | 0.75                                  | Nylon and polyethylene                                                                                                                                                                                                                              | Polyethylene, low density, {GLO}  and Nylon 6 {GLO}             |
| Leads - ballast                 |          |                                   | 80                           | 80                                | 80                                    | (50% terracotta; 50% lead from inside of car batteries recycling), only 10% remains in the water                                                                                                                                                    |                                                                 |
| Weight                          | kg/yr    | 0.3                               | 1.32                         | 0.72                              | 1.32                                  |                                                                                                                                                                                                                                                     |                                                                 |
| Lifetime                        | yr       |                                   | 5                            | 5                                 | 5                                     |                                                                                                                                                                                                                                                     |                                                                 |
| Traps                           | quantity | 1                                 | 4                            | 20                                | 35                                    | Main species caught: <i>Clarias</i>                                                                                                                                                                                                                 |                                                                 |
| Weight                          | kg/yr    |                                   | 0.03                         | 0.06                              | 0.12                                  | Net, nylon spools and kindling                                                                                                                                                                                                                      | Polyethylene, low density, {GLO}  and Nylon 6 {GLO}  market for |
| Nylon spools                    | quantity |                                   | 1                            | 2                                 | 4                                     | 210D/45 1/2LB                                                                                                                                                                                                                                       | Nylon 6 {GLO}  market for                                       |
| Weight                          | kg/yr    |                                   | 2.5                          | 5                                 | 10                                    |                                                                                                                                                                                                                                                     |                                                                 |
| Lifetime                        | yr       |                                   | 2                            | 2                                 | 2                                     |                                                                                                                                                                                                                                                     |                                                                 |
| Longlines                       | quantity |                                   | 2                            |                                   | 4                                     | Main species caught: <i>Clarias</i> and <i>Lates n.</i>                                                                                                                                                                                             |                                                                 |
| Nylon spools                    | quantity |                                   | 2                            |                                   | 4                                     | 210D/45 1/2LB                                                                                                                                                                                                                                       | Nylon 6 {GLO}  market for                                       |
| Weight                          | kg/yr    |                                   | 1                            |                                   | 2                                     |                                                                                                                                                                                                                                                     |                                                                 |
| Hooks                           | quantity |                                   | 4                            |                                   | 8                                     | Boxes (1000 units)                                                                                                                                                                                                                                  | Steel, low-alloyed, hot rolled {GLO}  market for                |
| Weight                          | kg/yr    |                                   | 1.2                          |                                   | 2.4                                   |                                                                                                                                                                                                                                                     |                                                                 |
| Lifetime                        | yr       |                                   | 1                            |                                   | 1                                     |                                                                                                                                                                                                                                                     |                                                                 |

**Table S9. Abridged life cycle inventories of transport for imported gear**

| Variables          | units         | <i>Clarias</i>  | <i>Tilapia</i>                   |
|--------------------|---------------|-----------------|----------------------------------|
| Type of production |               | Intensive ponds | Integrated fish farming in ponds |
| Feed consumption   | kg/t of fish  | 810             | 1196                             |
| Electricity        | kWh/t of fish | 41              | 3547                             |
| Diesel             | l/t of fish   | -               | 74.9                             |
| Lime               | kg/t of fish  | 5.2             | 19                               |

Source: Adapted from Bosma et al. (2011) and Henriksson et al. (2014)

**Table S10. Abridged life cycle inventories of transport for imported gear**

| Products       | Type of transport | Origin                      | Distance (km) One way | Ecoinvent background process used (Cut-off, U)                                                                        |
|----------------|-------------------|-----------------------------|-----------------------|-----------------------------------------------------------------------------------------------------------------------|
| Wood for canoe | Road              | Ivory Coast or Ghana        | 1 500                 | Transport, freight, lorry 16-32 metric ton, euro3 {RoW}  market for transport, freight, lorry 16-32 metric ton, EURO3 |
| Gear nets      | Ship              | Asia (Korea, China, Taiwan) | 19 446                | Transport, freight, sea, transoceanic ship {GLO}  market for                                                          |
|                | Road              | Ivory Coast or Ghana        | 1 500                 | Transport, freight, lorry 16-32 metric ton, euro3 {RoW}  market for transport, freight, lorry 16-32 metric ton, EURO3 |

**Table S11. Abridged life cycle inventories of collection operations of Malian artisanal fresh fish**

| Variables                           | Units  | Quantity | Description                           | Ecoinvent background process used (Cut-off, U)                              |
|-------------------------------------|--------|----------|---------------------------------------|-----------------------------------------------------------------------------|
| Collecting canoe                    |        |          |                                       |                                                                             |
| Canoe size                          | m      | 15       | African mahogany (Khaya senegalensis) | Occupation, forest et Sawnwood, board, softwood, raw, {GLO}                 |
| Lifetime                            | yr     | 15       |                                       |                                                                             |
| Load capacity                       | t      | 10       |                                       |                                                                             |
| Wood                                | t      | 5        |                                       |                                                                             |
| Engine power                        | HP     | 35       | Manufacture and combustion            | Diesel, burned in fishing vessel {GLO}  market for diesel, burned in vessel |
| Engine Lifetime                     | yr     | 5.0      |                                       |                                                                             |
| Fuel consumption                    | l      | 15       |                                       |                                                                             |
| Shea butter                         | kg/yr  | 45       |                                       |                                                                             |
| Collector storage                   |        |          |                                       |                                                                             |
| Containers                          | kg     | 50       | Polyurethane                          |                                                                             |
| Weight                              | g      | 300      |                                       |                                                                             |
| Lifetime                            | months | 1        |                                       |                                                                             |
| Insulated containers                | l      | 125      | Polyurethane from Ghana               | Polyurethane Foam PUF                                                       |
| Lifetime                            | yr     | 10       |                                       |                                                                             |
| Weight                              | kg     | 13       |                                       |                                                                             |
| Recycled refrigerators out of order | units  | 1        | Capacity 300 kg                       |                                                                             |
| Ice blocks or bags                  |        |          |                                       |                                                                             |

| Variables                                         | Units | Quantity | Description                        | Ecoinvent background process used (Cut-off, U) |
|---------------------------------------------------|-------|----------|------------------------------------|------------------------------------------------|
| Ice in plastic bags from private - individuals    | l     | 1,5      | 10 bags de 1.5 l per 100kg of fish |                                                |
| Industrial ice blocks                             | kg    | 300      | Per 1000 kg de transported fish    |                                                |
| <b>Market storage</b>                             |       |          |                                    |                                                |
| Recycled refrigerators out of order (wholesalers) | units | 2        | Capacity 300 kg                    |                                                |
| Industrial ice blocks                             | kg    | 25       | 200 ice blocks                     |                                                |

**Table S12. Abridged life cycle inventories of transport operations of Malian fish products**

| Products                     | Type of transport | Origin                                          | Distance (km)<br>One way | Ecoinvent background process used (Cut-off, U)                       |
|------------------------------|-------------------|-------------------------------------------------|--------------------------|----------------------------------------------------------------------|
| Smoked fish to urban markets | Road              | Mopti                                           | 635                      | Transport, freight, lorry 7.5-16 metric ton, euro3 {RoW}  market for |
| Smoked fish exported         | Road              | Mopti to Ivory Coast or Ghana                   | 1 500                    | Transport, freight, lorry 7.5-16 metric ton, euro3 {RoW}  market for |
| Fresh fish to urban markets  | Road              | Distance weighted by regional production volume | 545                      | Transport, freight, lorry 7.5-16 metric ton, euro3 {RoW}  market for |

**Table S13. Abridged life cycle inventories of transport operations of imported frozen fish (small pelagics)**

| Port of origin         | Distance to Bamako (km) | Distance to Dakar (km) | %  | Ecoinvent background process used (Cut-off, U)        |
|------------------------|-------------------------|------------------------|----|-------------------------------------------------------|
| Mauritania and Senegal | 1448                    |                        | 30 | Transport, freight, lorry with reefer, freezing {GLO} |
| Namibia                | 1371                    | 5 522                  | 27 |                                                       |
| Morocco                | 1371                    | 2 053                  | 23 |                                                       |

**Table S14. Abridged life cycle inventories of transport operations of imported frozen fish (fish farming)**

| Type of transport | Origin         | Destination | Distance (km)<br>One way | Ecoinvent background process used (Cut-off, U)                                     |
|-------------------|----------------|-------------|--------------------------|------------------------------------------------------------------------------------|
| Ship              | China, Vietnam | Senegal     | 19 446<br>16 800         | Transport, freight, sea, transoceanic ship with reefer, freezing {GLO}  market for |
| Road              | Dakar          | Bamako      | 1 200                    | Transport, freight, lorry with reefer, freezing {GLO}  market for                  |

## 2.2 Impacts

**Table S15. LCIA of Malian fisheries, imported fish (small pelagics and fish farming) (ReCiPe 2016 Endpoint (H) V1.03 / World (2010) H/A (per Area of Protection) and Cumulative Energy Demand v1.11)**

| Fish production                        | Total | Human health | Ecosystems | Resources | CED   |
|----------------------------------------|-------|--------------|------------|-----------|-------|
|                                        | Pt    | Pt           | Pt         | Pt        | MJ    |
| Casual (opportunistic) Malian fishers  | 3.0   | 2.7          | 0.2        | 0.1       | 6.0   |
| Agro- (part-time) Malian fishers       | 45.8  | 42.0         | 3.3        | 0.6       | 91.6  |
| Sedentary (diversified) Malian fishers | 28.6  | 26.4         | 1.9        | 0.3       | 57.2  |
| Migrant (full-time) Malian fishers     | 80.1  | 74.4         | 4.8        | 0.9       | 160.2 |

|                                                                                |       |       |      |     |       |
|--------------------------------------------------------------------------------|-------|-------|------|-----|-------|
| Tilapia extensive fish farming (China)                                         | 370.0 | 316.6 | 51.9 | 1.6 | 740.0 |
| Catfish based in pond (Vietnam)                                                | 73.4  | 56.8  | 16.2 | 0.3 | 146.7 |
| Small pelagic fish. capture by artisanal purse seines (Gambian process)        | 30.4  | 28.2  | 1.8  | 0.3 | 60.8  |
| Small pelagic fish. capture by artisanal encircling gillnets (Gambian process) | 45.6  | 42.4  | 2.8  | 0.5 | 91.3  |
| Frozen fish (industrial) - (Gambian process)                                   | 217.7 | 202.1 | 13.1 | 2.5 | 435.4 |

**Table S16. LCIA of Malian artisanal fisheries products and imported fish products (ReCiPe 2016 Endpoint (H) V1.03 / World (2010) H/A (per Area of Protection) and Cumulative Energy Demand v1.11**

| System                                                                     | Total | Human health | Ecosystems | Resources | CED    |
|----------------------------------------------------------------------------|-------|--------------|------------|-----------|--------|
|                                                                            | Pt    | Pt           | Pt         | Pt        | MJ     |
| Fresh fish at rural market                                                 | 15.0  | 13.8         | 0.98       | 0.25      | 4 731  |
| Fresh fish at urban markets                                                | 64.7  | 59.6         | 4.12       | 1.01      | 18 883 |
| Smoked fish at fishers place                                               | 139   | 129          | 8.69       | 1.55      | 25 882 |
| Smoked fish at urban market                                                | 145   | 134          | 9.10       | 1.70      | 28 270 |
| Smoked fish at export market                                               | 152   | 141          | 9.62       | 1.90      | 31 294 |
| Frozen marine fish imported to Mali                                        | 126   | 116          | 7.92       | 1.84      | 29 590 |
| Frozen <i>Clarias</i> imported to Mali (ML) from Vietnam until Bamako      | 129   | 108          | 19.60      | 1.41      | 36 795 |
| Frozen <i>Tilapia</i> imported to Mali (ML) from China until market Bamako | 429   | 371          | 55.46      | 2.69      | 98 006 |

## References

- Acosta-Alba, I., Avadí, A., 2021. Mapping fisheries value chains to facilitate their sustainability assessment: case studies in The Gambia and Mali. *Mar. Policy*.
- Andres, L., Alba, I.A., Nicolay, G., Oswald, M., Zerbo, H., 2020. Analyse de la chaîne de la pêche continentale en République du Mali, Rapport pour l'Union Européenne, DG-DEVCO. Value Chain Analysis for Development Project (VCA4D CTR 2016/375-804), 151 p + annexes. Brussels: European Commission, Directorate-General for International Cooperation and Development.
- Avadí, A., Deme, M., Mbaye, A., Ndenn, J., 2020. Fisheries and aquaculture Value Chain Analysis in The Gambia, Report for the European Union, DG-DEVCO. Value Chain Analysis for Development Project (VCA4D CTR 2016/375-804), 139p + annexes. Brussels: European Commission, Directorate-General for International Cooperation and Development.
- Bosma, R., Anh, P.T., Potting, J., 2011. Life cycle assessment of intensive striped catfish farming in the Mekong Delta for screening hotspots as input to environmental policy and research agenda. *Int. J. Life Cycle Assess.* 16, 903–915. <https://doi.org/10.1007/s11367-011-0324-4>
- Department of Fisheries, 2016. The 2016 Frame Survey Report. Banjul: Department of Fisheries.
- Fréon, P., Durand, H., Avadí, A., Huaranca, S., Orozco Moreyra, R., 2017. Life cycle assessment of three Peruvian fishmeal plants: Toward a cleaner production. *J. Clean. Prod.* 145, 50–63. <https://doi.org/10.1016/j.jclepro.2017.01.036>
- Henriksson, P.J.G., Zhang, W., Nahid, S.A.A., Newton, R., Phan, L.T., Dao, H.M., Zhang, Z., Jaithiang, J., Andong, R., Chaimanuskul, K., Vo, N.S., Hua, H. V., Haque, M.M., Das, R., Kruijssen, F., Satapornvanit, K., Nguyen,

P.T., Liu, Q., Liu, L., Wahab, M. a, Murray, F.J., Little, D.C., 2014. Final LCA case study report Primary data and literature sources adopted in the SEAT LCA studies, SEAT Deliverable Ref: D 3.5. Annex report. SEAT: Sustaining Ethical Aquaculture Trade.

UNEP, 2014. Cost-benefit Analysis of the most profitable fishing practices from a societal perspective in The Gambia.

Vázquez-Rowe, I., Moreira, M.T., Feijoo, G., 2012. Environmental assessment of frozen common octopus (*Octopus vulgaris*) captured by Spanish fishing vessels in the Mauritanian EEZ. *Mar. Policy* 36, 180–188. <https://doi.org/10.1016/j.marpol.2011.05.002>
